# Supplementary material for: Short-Term Exposure to PM2.5 Chemical Components and Depression Outpatient Visits: A Case-Crossover Analysis in Three Chinese Cities
Source: MDPI journal article supplement (doi:10.3390/toxics12020136), 2024-02-07
Supplement: s1 [file s1]

# Short-Term Exposure to PM<sub>2.5</sub> Chemical Components and Depression Outpatient Visits: A Case-Crossover Analysis in Three Chinese Cities

Zitong Zhuang <sup>1,†</sup>, Dan Li <sup>1,†</sup>, Shiyu Zhang <sup>1</sup>, Zhaoyang Hu <sup>1</sup>, Wenfeng Deng <sup>2</sup> and Hualiang Lin <sup>1,\*</sup>

<sup>1</sup> School of Public Health, Sun Yat-Sen University, No. 74 Zhongshan Road 2, Guangzhou 510080, China

<sup>2</sup> Huizhou Center for Disease Control and Prevention, No. 10 Jiangbei Fumin Road, Huizhou 516003, China

\* Correspondence: [linhualiang@mail.sysu.edu.cn](mailto:linhualiang@mail.sysu.edu.cn); Tel.: +86-020-87332455

† These authors contributed equally to this work.

## Supplementary Materials

**Table s1** Cross-validation of AICs of various *df* daily average air pollution

|                                | AIC      |
|--------------------------------|----------|
| air pollution ( <i>df</i> = 2) | 796773.0 |
| air pollution ( <i>df</i> = 3) | 796658.5 |
| air pollution ( <i>df</i> = 4) | 796566.1 |

Notes: AIC = Akaike information criterion; *df* = degree of freedom

**Table s2.** Descriptive summary of the demographic characteristics of the three cities.

|                                                                  | Huizhou     |             | Shenzhen    |             | Zhaoqing    |             |
|------------------------------------------------------------------|-------------|-------------|-------------|-------------|-------------|-------------|
|                                                                  | Case day    | Control day | Case day    | Control day | Case day    | Control day |
| N of days                                                        | 58,112      | 197,424     | 189,156     | 642,238     | 27,013      | 91,693      |
| Meteorologic variables                                           |             |             |             |             |             |             |
| Daily temperature (°C)                                           | 22.12±5.77  | 22.21±5.69  | 21.87±5.56  | 21.96±5.50  | 22.08±5.78  | 22.20±5.66  |
| Relative humidity (%)                                            | 78.24±12.95 | 78.43±12.96 | 78.44±12.02 | 78.55±12.01 | 79.33±10.82 | 79.63±10.46 |
| Concentrations of PM <sub>2.5</sub> and its chemical composition |             |             |             |             |             |             |
| PM <sub>2.5</sub> (µg/m <sup>3</sup> )                           | 29.86±15.90 | 29.80±15.98 | 28.73±14.20 | 28.67±14.34 | 29.32±18.06 | 29.21±17.71 |
| BC (µg/m <sup>3</sup> )                                          | 1.87±1.04   | 1.87±1.04   | 1.68±0.91   | 1.68±0.91   | 1.55±0.86   | 1.55±0.84   |
| OM (µg/m <sup>3</sup> )                                          | 8.28±4.66   | 8.25±4.65   | 8.15±4.44   | 8.14±4.48   | 7.48±4.45   | 7.46±4.41   |
| SO <sub>4</sub> <sup>2-</sup> (µg/m <sup>3</sup> )               | 6.36±3.31   | 6.28±3.34   | 5.90±3.24   | 5.89±3.28   | 5.90±3.50   | 5.89±3.41   |
| NO <sub>3</sub> <sup>-</sup> (µg/m <sup>3</sup> )                | 4.52±3.57   | 4.45±3.61   | 3.42±2.74   | 3.37±2.73   | 5.50±4.99   | 5.45±4.90   |
| NH <sub>4</sub> <sup>+</sup> (µg/m <sup>3</sup> )                | 3.73±2.72   | 3.68±2.74   | 2.61±1.82   | 2.57±1.82   | 4.14±3.43   | 4.12±3.35   |

Notes: PM<sub>2.5</sub> = fine particulate matter having an aerodynamic diameter of 2.5 µm or less; SO<sub>4</sub><sup>2-</sup> = sulfate; NO<sub>3</sub><sup>-</sup> = nitrate; NH<sub>4</sub><sup>+</sup> = ammonium; OM = organic matter; BC = black carbon.

**Table s3.** Spearman correlation among PM<sub>2.5</sub> and its chemical components and meteorologic variables.

|                               | PM <sub>2.5</sub> | SO <sub>4</sub> <sup>2-</sup> | NO <sub>3</sub> <sup>-</sup> | NH <sub>4</sub> <sup>+</sup> | OM    | BC    | Daily temperature | Relative humidity |
|-------------------------------|-------------------|-------------------------------|------------------------------|------------------------------|-------|-------|-------------------|-------------------|
| PM <sub>2.5</sub>             | 1                 | —                             | —                            | —                            | —     | —     | —                 | —                 |
| SO <sub>4</sub> <sup>2-</sup> | 0.96              | 1                             | —                            | —                            | —     | —     | —                 | —                 |
| NO <sub>3</sub> <sup>-</sup>  | 0.87              | 0.84                          | 1                            | —                            | —     | —     | —                 | —                 |
| NH <sub>4</sub> <sup>+</sup>  | 0.87              | 0.84                          | 0.97                         | 1                            | —     | —     | —                 | —                 |
| OM                            | 0.97              | 0.95                          | 0.81                         | 0.80                         | 1     | —     | —                 | —                 |
| BC                            | 0.93              | 0.94                          | 0.76                         | 0.77                         | 0.96  | 1     | —                 | —                 |
| Daily temperature             | -0.32             | -0.30                         | -0.55                        | -0.50                        | -0.29 | -0.24 | 1                 | —                 |
| Relative humidity             | -0.36             | -0.32                         | -0.49                        | -0.44                        | -0.36 | -0.28 | 0.53              | 1                 |

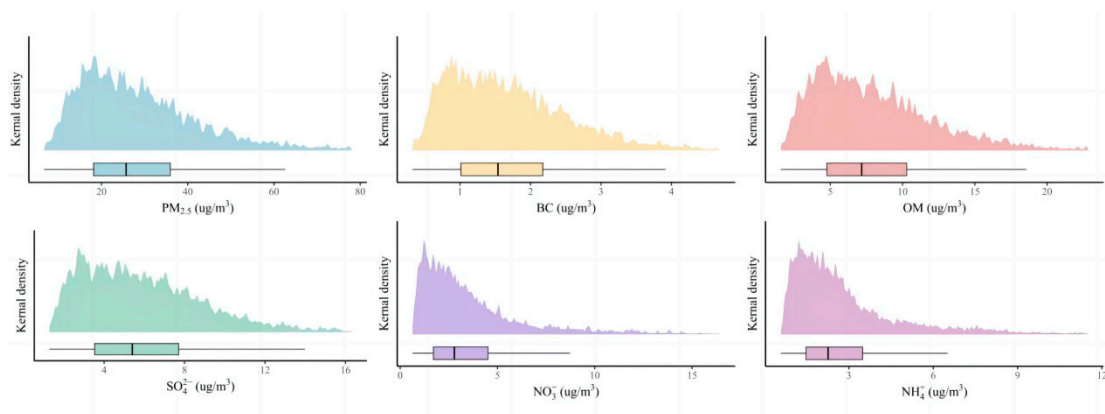

**Figure s1.** Box plots of exposure concentration of PM<sub>2.5</sub> chemical components and the distribution density of the total study population at corresponding concentrations.

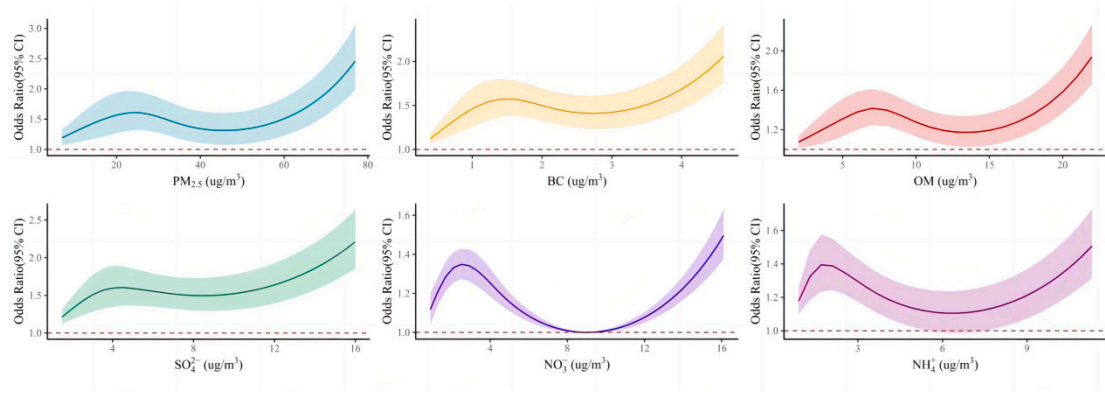

**Figure s2.** Overall exposure-response relationships of PM<sub>2.5</sub> and its chemical components with depression outpatient visits in the total study population at a 21-day lag in *df* of 4. The solid smooth lines and shaded areas represent the odds ratio of cause-specific mental disorder morbidity and its 95% CI, respectively. The horizontal dashed line in each panel indicates the odds ratio of 1.

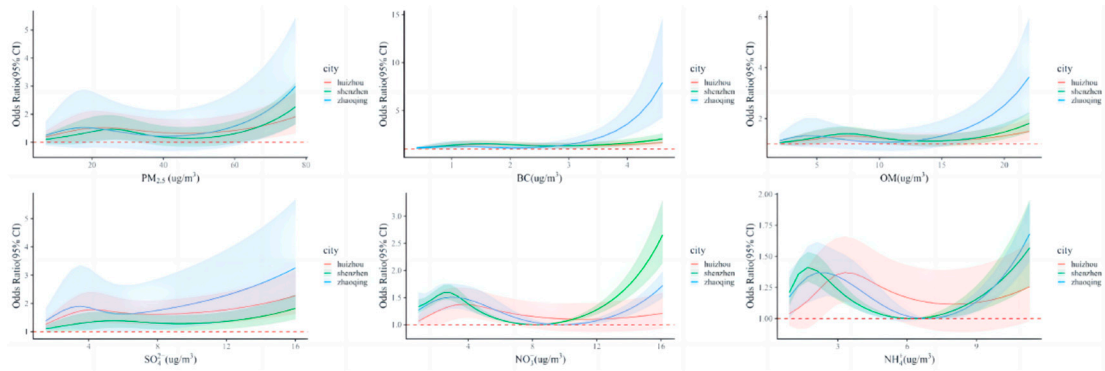

**Figure s3.** Overall exposure-response relationships of PM<sub>2.5</sub> and its chemical components with depression outpatient visits at lag 21-day in each three cities. The solid smooth lines and shaded areas represent the odds ratio of cause-specific mental disorder morbidity and its 95% CI, respectively. The horizontal dashed line in each panel indicates the odds ratio of 1.

**Table s4.** The cumulative effects of PM<sub>2.5</sub> and its chemical components on depression outpatient visits with *df* of 4, on lag 0-7, 0-14, 0-21 days, at the 50<sup>th</sup> percentile concentration in each three cities, with the concentration corresponding to the minimum risk as the reference.

| Concentration(μg/m <sup>3</sup> ) |      | Odds Ratio (95% CI)  |                      |                      |
|-----------------------------------|------|----------------------|----------------------|----------------------|
|                                   |      | Lag 0-7              | Lag 0-14             | Lag 0-21             |
| Huizhou                           |      |                      |                      |                      |
| PM <sub>2.5</sub>                 | 26.1 | 1.132 (0.959, 1.336) | 1.436 (1.131, 1.823) | 1.510 (1.104, 2.065) |
| BC                                | 1.7  | 0.962 (0.847, 1.094) | 0.831 (0.692, 0.998) | 0.734 (0.578, 0.933) |
| OM                                | 7.2  | 1.042 (0.925, 1.174) | 1.246 (1.052, 1.474) | 1.317 (1.056, 1.644) |
| SO <sub>4</sub> <sup>2-</sup>     | 5.7  | 1.100 (1.008, 1.201) | 1.263 (1.109, 1.439) | 1.359 (1.148, 1.610) |
| NO <sub>3</sub> <sup>-</sup>      | 3.4  | 1.008 (0.982, 1.035) | 1.027 (0.988, 1.068) | 1.045 (0.993, 1.099) |
| NH <sub>4</sub> <sup>+</sup>      | 2.9  | 0.998 (0.987, 1.009) | 0.992 (0.976, 1.008) | 0.990 (0.969, 1.011) |
| Shenzhen                          |      |                      |                      |                      |
| PM <sub>2.5</sub>                 | 26.0 | 1.169 (1.016, 1.346) | 1.525 (1.230, 1.891) | 1.465 (1.091, 1.967) |
| BC                                | 1.5  | 0.934 (0.833, 1.046) | 0.775 (0.649, 0.925) | 0.713 (0.559, 0.908) |
| OM                                | 7.4  | 1.019 (0.930, 1.117) | 1.276 (1.107, 1.470) | 1.405 (1.162, 1.699) |
| SO <sub>4</sub> <sup>2-</sup>     | 5.4  | 1.015 (0.950, 1.085) | 1.140 (1.028, 1.264) | 1.146 (0.998, 1.317) |
| NO <sub>3</sub> <sup>-</sup>      | 2.6  | 0.616 (0.510, 0.744) | 0.373 (0.281, 0.494) | 0.174 (0.116, 0.260) |
| NH <sub>4</sub> <sup>+</sup>      | 2.1  | 0.961 (0.756, 1.221) | 0.645 (0.456, 0.912) | 0.363 (0.220, 0.598) |
| Zhaoqing                          |      |                      |                      |                      |
| PM <sub>2.5</sub>                 | 24.0 | 1.060 (0.781, 1.438) | 1.234 (0.795, 1.915) | 1.446 (0.809, 2.584) |

|                               |     |                      |                      |                      |
|-------------------------------|-----|----------------------|----------------------|----------------------|
| BC                            | 1.3 | 1.126 (0.914, 1.386) | 0.919 (0.691, 1.221) | 0.791 (0.543, 1.154) |
| OM                            | 6.3 | 0.981 (0.798, 1.205) | 1.074 (0.801, 1.440) | 1.259 (0.849, 1.866) |
| SO <sub>4</sub> <sup>2-</sup> | 5.0 | 1.102 (0.927, 1.312) | 1.271 (0.984, 1.640) | 1.476 (1.055, 2.066) |
| NO <sub>3</sub> <sup>-</sup>  | 3.6 | 0.412 (0.332, 0.513) | 0.233 (0.162, 0.335) | 0.108 (0.066, 0.178) |
| NH <sub>4</sub> <sup>+</sup>  | 3   | 0.428 (0.340, 0.537) | 0.238 (0.165, 0.343) | 0.111 (0.067, 0.184) |

---

**Table s5.** Gender stratified analysis for the cumulative effect on lag 0-7, 0-14, 0-21 days at 50<sup>th</sup> percentile concentration of PM<sub>2.5</sub> and its chemical components with depression outpatient visits.

|                               | Odds Ratio (95% CI)  |                      |                      |                      |                      |                      |
|-------------------------------|----------------------|----------------------|----------------------|----------------------|----------------------|----------------------|
|                               | Lag 0-7              |                      | Lag 0-14             |                      | Lag 0-21             |                      |
|                               | Male                 | Female               | Male                 | Female               | Male                 | Female               |
| PM <sub>2.5</sub>             | 1.121 (0.969, 1.297) | 1.232 (1.081, 1.404) | 1.399 (1.124, 1.740) | 1.667 (1.371, 2.028) | 1.377 (1.027, 1.847) | 1.820 (1.398, 2.369) |
| BC                            | 0.946 (0.846, 1.059) | 0.934 (0.846, 1.033) | 0.836 (0.707, 0.988) | 0.748 (0.645, 0.868) | 0.749 (0.598, 0.938) | 0.635 (0.520, 0.777) |
| OM                            | 1.004 (0.910, 1.107) | 1.077 (0.987, 1.175) | 1.178 (1.018, 1.363) | 1.367 (1.201, 1.556) | 1.255 (1.034, 1.524) | 1.561 (1.314, 1.855) |
| SO <sub>4</sub> <sup>2-</sup> | 1.054 (0.980, 1.135) | 1.078 (1.009, 1.151) | 1.175 (1.049, 1.316) | 1.253 (1.133, 1.386) | 1.179 (1.014, 1.370) | 1.380 (1.206, 1.578) |
| NO <sub>3</sub> <sup>-</sup>  | 0.679 (0.578, 0.797) | 0.992 (0.985, 1.000) | 0.536 (0.417, 0.689) | 0.982 (0.970, 0.993) | 0.361 (0.258, 0.505) | 0.971 (0.956, 0.986) |
| NH <sub>4</sub> <sup>+</sup>  | 0.996 (0.986, 1.006) | 0.985 (0.976, 0.994) | 0.982 (0.967, 0.998) | 0.969 (0.956, 0.983) | 0.976 (0.956, 0.997) | 0.958 (0.941, 0.976) |

**Table s6.** Age stratified analysis for the cumulative effect on lag 0-7, 0-14, 0-21 days at 50<sup>th</sup> percentile concentration of PM<sub>2.5</sub> and its chemical components with depression outpatient visits.

|                               | Odds Ratio (95% CI)  |                      |                      |                      |                      |                      |
|-------------------------------|----------------------|----------------------|----------------------|----------------------|----------------------|----------------------|
|                               | Lag 0-7              |                      | Lag 0-14             |                      | Lag 0-21             |                      |
|                               | <60                  | ≥60                  | <60                  | ≥60                  | <60                  | ≥60                  |
| PM <sub>2.5</sub>             | 1.168 (1.054, 1.295) | 1.285 (0.962, 1.716) | 1.523 (1.305, 1.778) | 1.695 (1.103, 2.605) | 1.559 (1.266, 1.920) | 2.051 (1.154, 3.645) |
| BC                            | 0.941 (0.869, 1.018) | 0.935 (0.750, 1.166) | 0.789 (0.701, 0.889) | 0.762 (0.551, 1.055) | 0.696 (0.593, 0.816) | 0.601 (0.389, 0.929) |
| OM                            | 1.035 (0.966, 1.109) | 1.123 (0.924, 1.365) | 1.262 (1.139, 1.399) | 1.435 (1.075, 1.915) | 1.379 (1.202, 1.581) | 1.765 (1.203, 2.590) |
| SO <sub>4</sub> <sup>2-</sup> | 1.063 (1.010, 1.120) | 1.099 (0.946, 1.275) | 1.218 (1.124, 1.319) | 1.220 (0.971, 1.533) | 1.286 (1.156, 1.430) | 1.297 (0.958, 1.757) |
| NO <sub>3</sub> <sup>-</sup>  | 0.657 (0.585, 0.738) | 0.995 (0.978, 1.012) | 0.513 (0.428, 0.616) | 0.986 (0.961, 1.012) | 0.342 (0.268, 0.437) | 0.973 (0.941, 1.006) |
| NH <sub>4</sub> <sup>+</sup>  | 0.990 (0.983, 0.997) | 0.988 (0.969, 1.009) | 0.975 (0.965, 0.986) | 0.973 (0.943, 1.003) | 0.968 (0.954, 0.982) | 0.953 (0.915, 0.992) |

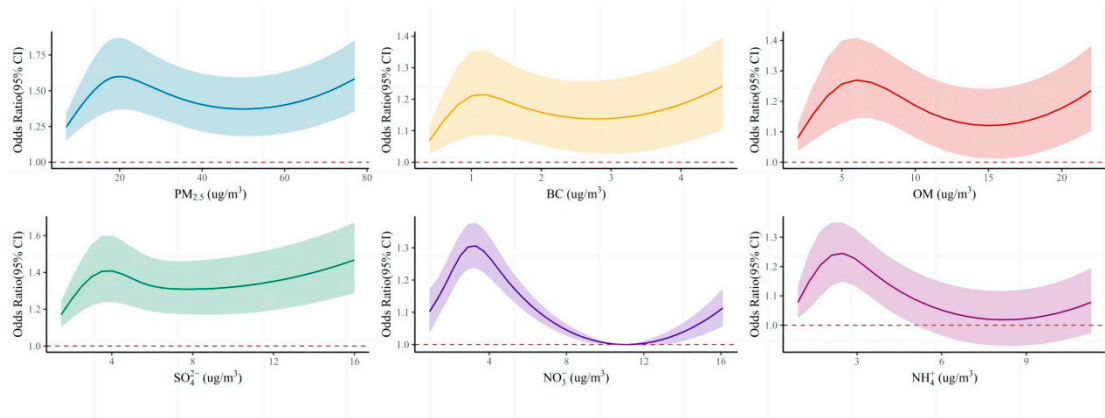

**Figure s4.** Overall exposure-response relationships of PM<sub>2.5</sub> and its chemical components with depression outpatient visits at lag 14-day in the total study population in *df* of 4. The solid smooth lines and shaded areas represent the odds ratio of cause-specific mental disorder morbidity and its 95% CI, respectively. The horizontal dashed line in each panel indicates the odds ratio of 1.

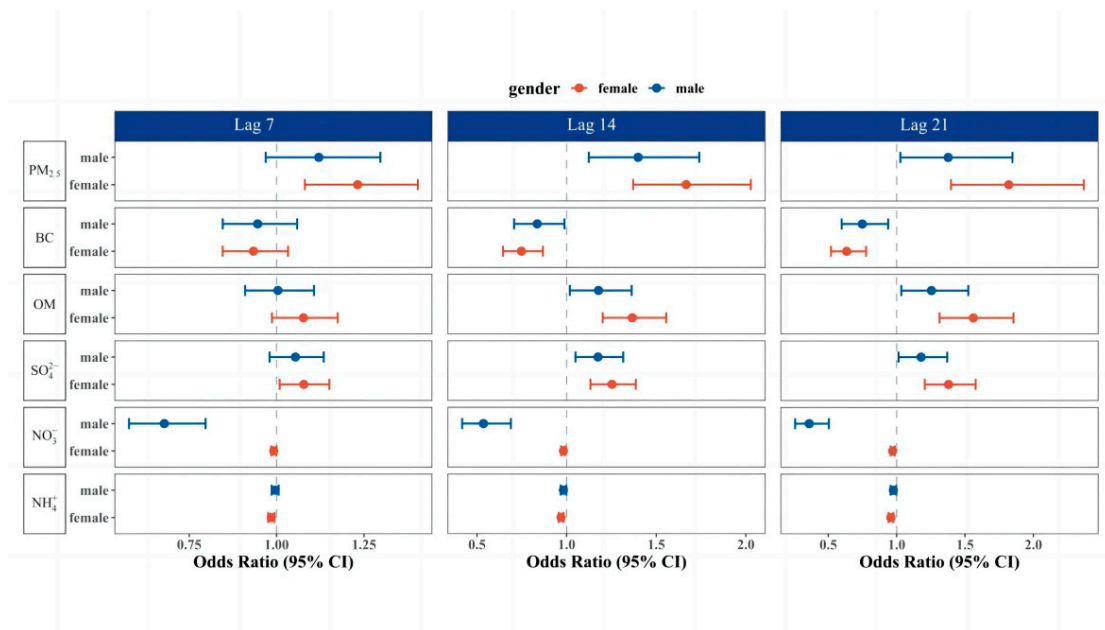

**Figure s5.** Gender-stratified analysis for the cumulative association on lag 0-7, 0-14, 0-21 days at 50<sup>th</sup> percentile concentration of PM<sub>2.5</sub> and its chemical components with depression outpatient visits.



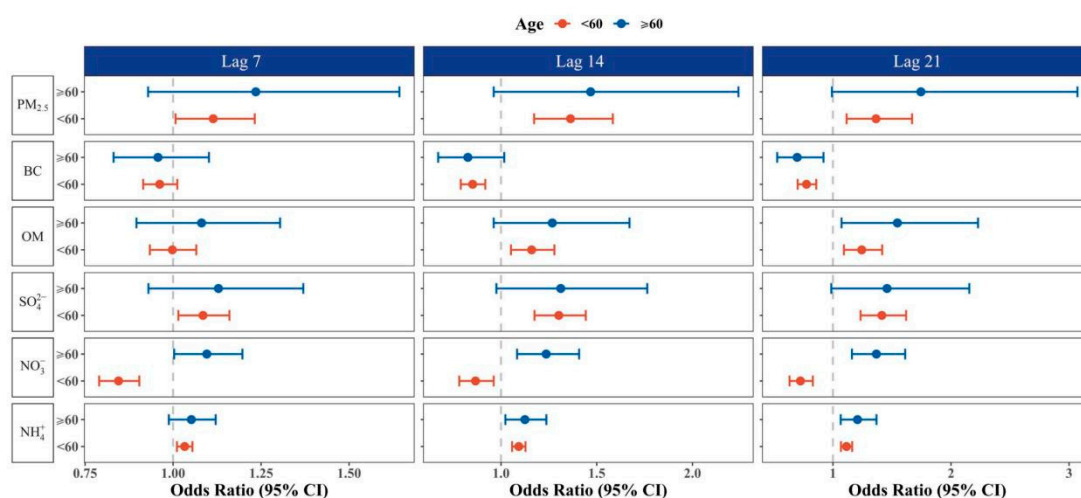

**Figure s6.** Age-stratified analyses for the cumulative association on lag 0-7, 0-14, 0-21 days at 50<sup>th</sup> percentile concentration of PM<sub>2.5</sub> and its chemical components with depression outpatient visits.

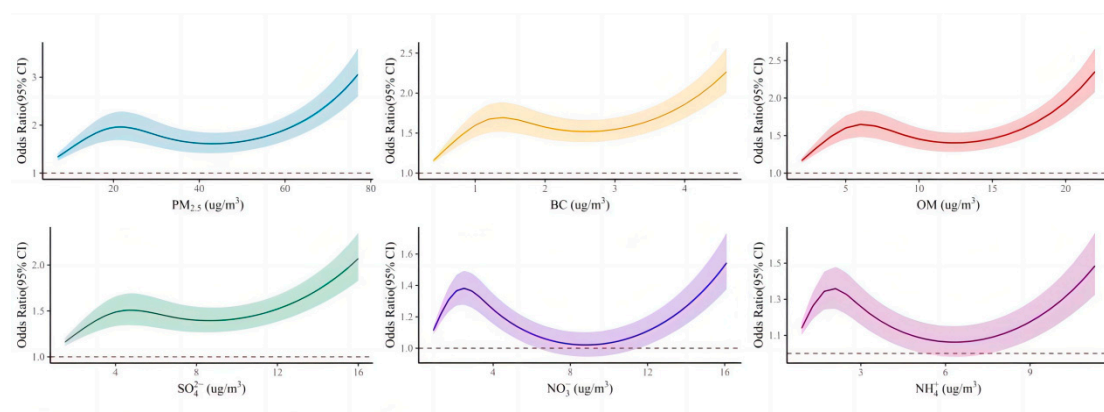

**Figure s7.** Overall exposure-response relationships of PM<sub>2.5</sub> and its chemical components with depression outpatient visits at lag 21-day in the total study population. The solid smooth lines and shaded areas represent the odds ratio of cause-specific mental disorder morbidity and its 95% CI, respectively. The horizontal dashed line in

each panel indicates the odds ratio of 1. ( $df = 3$  for daily temperature and relative humidity)

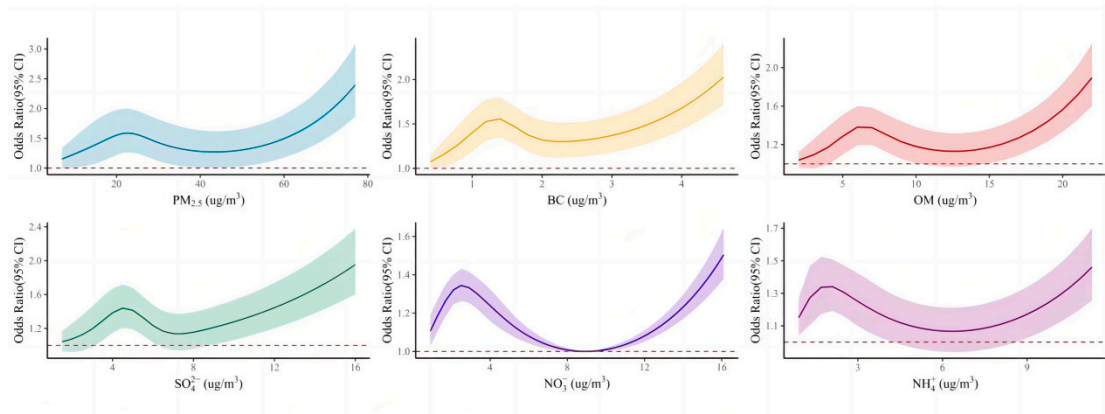

**Figure s8.** Overall exposure-response relationships of PM<sub>2.5</sub> and its chemical components with depression outpatient visits at lag 21-day in the total study population. The solid smooth lines and shaded areas represent the odds ratio of cause-specific mental disorder morbidity and its 95% CI, respectively. The horizontal dashed line in each panel indicates the odds ratio of 1. ( $df = 5$  for daily temperature and relative humidity)

**Table s7.** The cumulative effects of PM<sub>2.5</sub> and its chemical components on depression outpatient visits, on lag 0-7, 0-14, 0-21 days, with the concentration corresponding to the minimum risk as the reference. (*df*= 3 for daily temperature and relative humidity)

| Concentration                 |      | Odds Ratio (95% CI)  |                      |                      |
|-------------------------------|------|----------------------|----------------------|----------------------|
| ( $\mu\text{g}/\text{m}^3$ )  |      | Lag 0-7              | Lag 0-14             | Lag 0-21             |
| PM <sub>2.5</sub>             |      |                      |                      |                      |
| 25 <sup>th</sup>              | 18.1 | 1.189 (1.107, 1.277) | 1.615 (1.451, 1.798) | 1.909 (1.658, 2.197) |
| 50 <sup>th</sup>              | 25.9 | 1.182 (1.093, 1.278) | 1.616 (1.438, 1.815) | 1.924 (1.652, 2.241) |
| 75 <sup>th</sup>              | 36.5 | 1.122 (1.044, 1.206) | 1.427 (1.283, 1.587) | 1.664 (1.449, 1.911) |
| BC                            |      |                      |                      |                      |
| 25 <sup>th</sup>              | 1.0  | 0.947 (0.901, 0.995) | 0.780 (0.724, 0.839) | 0.625 (0.568, 0.688) |
| 50 <sup>th</sup>              | 1.5  | 0.947 (0.901, 0.995) | 0.780 (0.724, 0.839) | 0.625 (0.568, 0.688) |
| 75 <sup>th</sup>              | 2.2  | 0.964 (0.931, 0.998) | 0.843 (0.801, 0.887) | 0.723 (0.676, 0.773) |
| OM                            |      |                      |                      |                      |
| 25 <sup>th</sup>              | 4.7  | 1.079 (1.035, 1.125) | 1.306 (1.226, 1.391) | 1.488 (1.371, 1.615) |
| 50 <sup>th</sup>              | 7.2  | 1.084 (1.025, 1.147) | 1.374 (1.264, 1.494) | 1.629 (1.463, 1.815) |
| 75 <sup>th</sup>              | 10.4 | 1.045 (0.993, 1.100) | 1.250 (1.160, 1.348) | 1.452 (1.318, 1.599) |
| SO <sub>4</sub> <sup>2-</sup> |      |                      |                      |                      |
| 25 <sup>th</sup>              | 3.5  | 1.016 (1.005, 1.026) | 1.046 (1.030, 1.062) | 1.076 (1.055, 1.098) |
| 50 <sup>th</sup>              | 5.4  | 1.043 (1.014, 1.073) | 1.130 (1.083, 1.179) | 1.224 (1.159, 1.293) |
| 75 <sup>th</sup>              | 7.8  | 1.061 (1.018, 1.106) | 1.191 (1.119, 1.268) | 1.342 (1.238, 1.454) |
| NO <sub>3</sub> <sup>-</sup>  |      |                      |                      |                      |

|                              |     |                      |                      |                      |
|------------------------------|-----|----------------------|----------------------|----------------------|
| 25 <sup>th</sup>             | 1.7 | 0.959 (0.945, 0.974) | 0.897 (0.877, 0.917) | 0.877 (0.852, 0.902) |
| 50 <sup>th</sup>             | 2.8 | 0.992 (0.989, 0.995) | 0.980 (0.976, 0.984) | 0.976 (0.970, 0.981) |
| 75 <sup>th</sup>             | 4.7 | 1.045 (1.027, 1.063) | 1.123 (1.095, 1.151) | 1.148 (1.112, 1.185) |
| NH <sub>4</sub> <sup>+</sup> |     |                      |                      |                      |
| 25 <sup>th</sup>             | 1.5 | 0.953 (0.933, 0.974) | 0.879 (0.851, 0.907) | 0.852 (0.818, 0.887) |
| 50 <sup>th</sup>             | 2.3 | 0.991 (0.987, 0.995) | 0.977 (0.971, 0.982) | 0.971 (0.964, 0.979) |
| 75 <sup>th</sup>             | 3.6 | 1.023 (1.012, 1.033) | 0.977 (0.971, 0.982) | 1.077 (1.056, 1.098) |

**Table s8.** The cumulative effects of PM<sub>2.5</sub> and its chemical components on depression outpatient visits, on lag 0-7, 0-14, 0-21 days, with the concentration corresponding to the minimum risk as the reference. (*df*= 5 for daily temperature and relative humidity)

| Concentration        |      | Odds Ratio (95% CI)  |                      |                      |
|----------------------|------|----------------------|----------------------|----------------------|
| (µg/m <sup>3</sup> ) |      | Lag 0-7              | Lag 0-14             | Lag 0-21             |
| PM <sub>2.5</sub>    |      |                      |                      |                      |
| 25 <sup>th</sup>     | 18.1 | 1.160 (1.023, 1.314) | 1.552 (1.282, 1.879) | 1.493 (1.159, 1.922) |
| 50 <sup>th</sup>     | 25.9 | 1.148 (1.026, 1.285) | 1.554 (1.309, 1.844) | 1.561 (1.244, 1.959) |
| 75 <sup>th</sup>     | 36.5 | 1.061 (0.938, 1.200) | 1.352 (1.121, 1.630) | 1.315 (1.027, 1.683) |
| BC                   |      |                      |                      |                      |
| 25 <sup>th</sup>     | 1.0  | 0.969 (0.892, 1.052) | 0.790 (0.698, 0.894) | 0.714 (0.606, 0.840) |
| 50 <sup>th</sup>     | 1.5  | 0.969 (0.892, 1.052) | 0.790 (0.698, 0.894) | 0.714 (0.606, 0.840) |
| 75 <sup>th</sup>     | 2.2  | 0.964 (0.918, 1.012) | 0.842 (0.783, 0.906) | 0.766 (0.696, 0.843) |
| OM                   |      |                      |                      |                      |

|                               |      |                      |                      |                      |
|-------------------------------|------|----------------------|----------------------|----------------------|
| 25 <sup>th</sup>              | 4.7  | 1.020 (0.939, 1.108) | 1.173 (1.034, 1.330) | 1.172 (0.993, 1.384) |
| 50 <sup>th</sup>              | 7.2  | 1.044 (0.973, 1.120) | 1.276 (1.146, 1.420) | 1.376 (1.195, 1.585) |
| 75 <sup>th</sup>              | 10.4 | 0.985 (0.909, 1.068) | 1.132 (1.004, 1.278) | 1.180 (1.007, 1.383) |
| SO <sub>4</sub> <sup>2-</sup> |      |                      |                      |                      |
| 25 <sup>th</sup>              | 3.5  | 0.997 (0.971, 1.023) | 1.026 (0.985, 1.069) | 1.024 (0.971, 1.079) |
| 50 <sup>th</sup>              | 5.4  | 1.006 (0.945, 1.071) | 1.096 (0.995, 1.208) | 1.106 (0.974, 1.256) |
| 75 <sup>th</sup>              | 7.8  | 1.047 (0.977, 1.123) | 1.205 (1.081, 1.343) | 1.267 (1.100, 1.460) |
| NO <sub>3</sub> <sup>-</sup>  |      |                      |                      |                      |
| 25 <sup>th</sup>              | 1.7  | 0.639 (0.564, 0.724) | 0.432 (0.352, 0.531) | 0.285 (0.217, 0.373) |
| 50 <sup>th</sup>              | 2.8  | 0.634 (0.567, 0.708) | 0.466 (0.389, 0.560) | 0.309 (0.243, 0.393) |
| 75 <sup>th</sup>              | 4.7  | 0.651 (0.583, 0.727) | 0.519 (0.434, 0.620) | 0.354 (0.280, 0.447) |
| NH <sub>4</sub> <sup>+</sup>  |      |                      |                      |                      |
| 25 <sup>th</sup>              | 1.5  | 0.940 (0.889, 0.994) | 0.846 (0.776, 0.922) | 0.844 (0.752, 0.947) |
| 50 <sup>th</sup>              | 2.3  | 0.990 (0.982, 0.998) | 0.973 (0.961, 0.985) | 0.971 (0.954, 0.987) |
| 75 <sup>th</sup>              | 3.6  | 1.021 (1.006, 1.037) | 1.059 (1.035, 1.084) | 1.074 (1.042, 1.107) |

---
